# Supplementary material
Source: PubMed Central journal article supplement (PMC4257862)
Supplement: NIHMS628093-supplement-supp.pdf [file NIHMS628093-supplement-supp.pdf]

## Supplementary information for:

### Pharmacologic inhibition of histone demethylation as a therapy for pediatric brainstem glioma

Rintaro Hashizume<sup>1</sup>, Noemi Andor<sup>2</sup>, Yuichiro Ihara<sup>2</sup>, Robin Lerner<sup>2</sup>, Haiyun Gan<sup>3</sup>, Xiaoyue Chen<sup>3</sup>, Dong Fang<sup>3</sup>, Xi Huang<sup>4</sup>, Maxwell W. Tom<sup>2</sup>, Vy Ngo<sup>5</sup>, David Solomon<sup>6,7</sup>, Sabine Mueller<sup>2,8,9</sup>, Pamela L. Paris<sup>5</sup>, Zhiguo Zhang<sup>3</sup>, Claudia Petritsch<sup>2</sup>, Nalin Gupta<sup>2</sup>, Todd A. Waldman<sup>7</sup> and C. David James<sup>1</sup>

<sup>1</sup>Department of Neurological Surgery, Feinberg School of Medicine, Northwestern University, Chicago, IL, USA

<sup>2</sup>Department of Neurological Surgery, University of California, San Francisco, San Francisco, CA, USA

<sup>3</sup>Department of Biochemistry and Molecular Biology, Mayo Clinic, Rochester, MN, USA

<sup>4</sup>Department of Physiology, University of California, San Francisco, San Francisco, CA, USA

<sup>5</sup>Department of Urology, University of California, San Francisco, San Francisco, CA, USA

<sup>6</sup>Department of Pathology, University of California, San Francisco, San Francisco, CA, USA

<sup>7</sup>Lombardi Comprehensive Cancer Center, Georgetown University School of Medicine, Washington, D.C., USA

<sup>8</sup>Department of Neurology, University of California, San Francisco, San Francisco, CA, USA

<sup>9</sup>Department of Pediatrics, University of California, San Francisco, San Francisco, CA, USA

Corresponding Author:

Rintaro Hashizume, MD, PhD

Department of Neurological Surgery

Feinberg School of Medicine, Northwestern University

300 E Superior Street

Tarry Building 2-709

Chicago, IL 60611

Phone: 312-503-3822

Fax: 312-503-3552

E-mail: rintaro.hashizume@northwestern.edu

## Supplementary Table 1

| <u>Cell Source</u> | <u>Age/G</u> | <u>Diagnosis</u> | <u>Location</u> | <u>Known Mutation</u>                   |
|--------------------|--------------|------------------|-----------------|-----------------------------------------|
| SF7761             | 6/F          | DIPG             | Pons            | <i>H3F3A</i> K27M                       |
| SF8628             | 3/F          | DIPG             | Pons            | <i>H3F3A</i> K27M                       |
| SF9012             | 17/F         | GBM              | Front-parietal  | <i>PTEN</i> deletion                    |
| SF9402             | 6/F          | GBM              | Cerebellum      | <i>EGFR</i> amplification               |
| SF9427             | 9/F          | GBM              | Frontal         | None identified                         |
| KNS42              | 16/M         | GBM              | Front-parietal  | <i>H3F3A</i> G34V                       |
| GBM43              | 69/M         | GBM              | Temporal        | <i>TP53</i> F270C<br><i>CDKN2A</i> null |

---

In addition to the genes indicated above, these tumors were also analyzed and determined to be of wild type sequence for *BRAF*, *IDH1*, *HIST1H3B*, *PTEN*. G, gender; F, female; M, male.

**Supplementary Table 1. Clinical characteristics of patients whose tumors were used to derive the cell lines used in this report.**

## Supplementary Figure 1

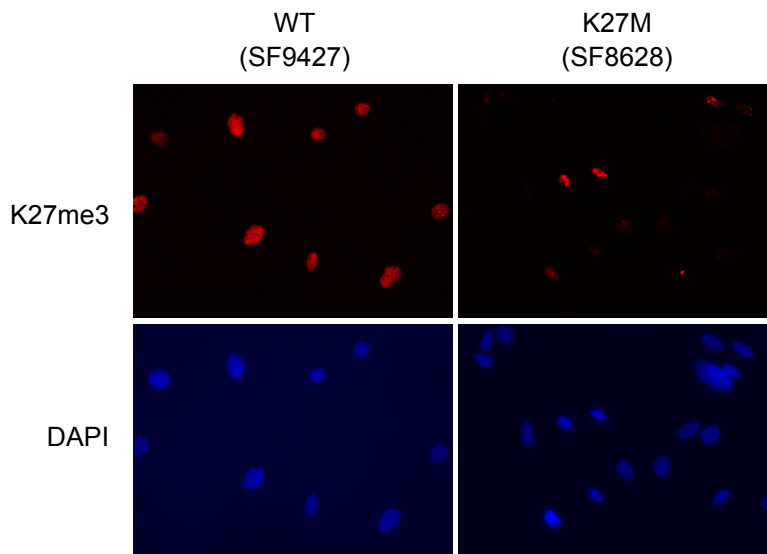

**Supplementary Figure 1. Comparison of K27me3 expression in K27 wild-type (SF9427) and K27M mutant (SF8628) glioma cells by fluorescence immunocytochemistry.** Results show lesser K27me3-associated fluorescence in K27M cells. DNA staining is by DAPI. WT, wild type.

## Supplementary Figure 2

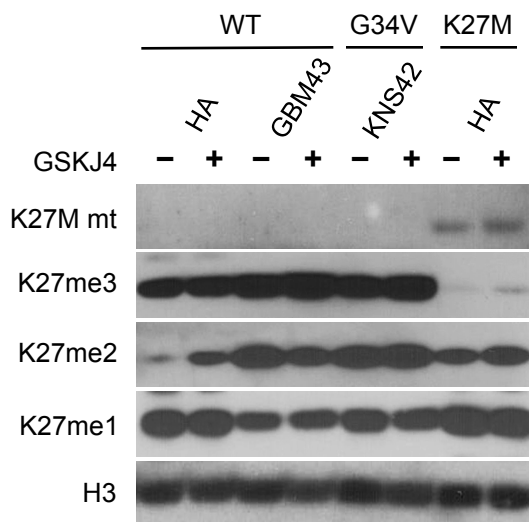

**Supplementary Figure 2. GSKJ4 increases K27 methylation in human astrocytes (HAs) with transgene expression of K27M mutation.** Results from immunoblot analysis of K27M mt, K27me3, K27me2, K27me1, and total histone H3 in additional K27 wild type and G34V mutant glioma cells, as well as HAs with and without transgene expression of K27M mutation, and treated with or without 6  $\mu$ M (HA WT, GBM43, KNS42) or 5  $\mu$ M (HA K27M) GSKJ4 for 72 h.

## Supplementary Figure 3

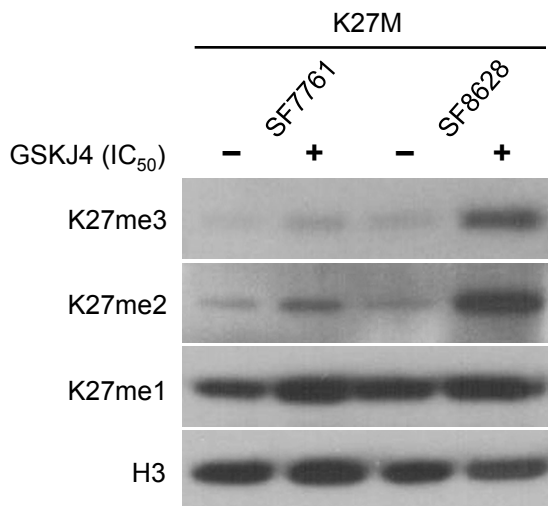

**Supplementary Figure 3. IC<sub>50</sub> concentrations of GSKJ4 increase K27 methylation in K27M glioma cells.** Results from immunoblot analysis of K27me3, K27me2, K27me1, and total histone H3 in K27M glioma cells (SF7761 and SF8628) treated with their respective IC<sub>50</sub> concentrations of GSKJ4 (**Fig. 1d**) for 72 h.

## Supplementary Figure 4

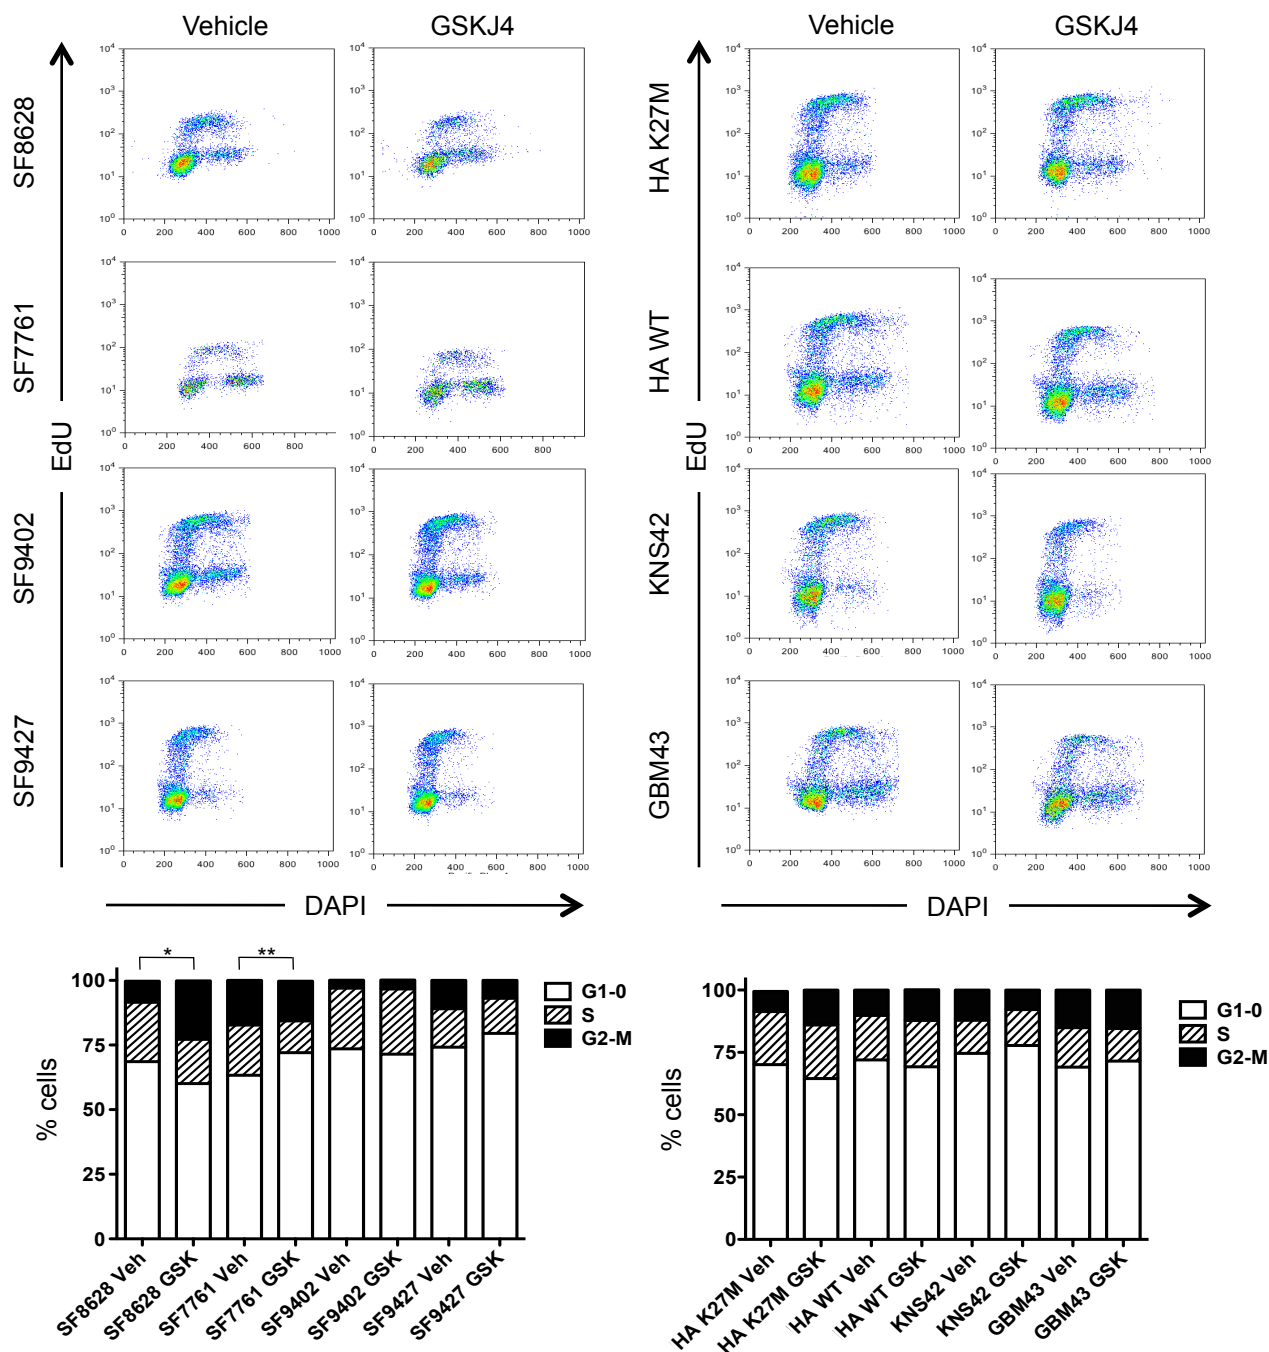

**Supplementary Figure 4. Analysis of GSKJ4 effects on cell cycle distributions.** Cells were treated with 3  $\mu$ M GSKJ4 for 72 h, then pulsed with 10  $\mu$ M EdU for 30 min, then stained with DAPI, then analyzed by flow cytometry. Cell sorting scatter plots for vehicle and GSKJ4 treated cells are shown above, with graphs below showing cell cycle composition for each cell type and each treatment (Unpaired *t*-test values for comparisons between vehicle and GSKJ4 treatment in SF8628 and SF7761 cells, \*  $P < 0.010$ ; \*\*  $P < 0.001$ ).

## Supplementary Figure 5

**a.**

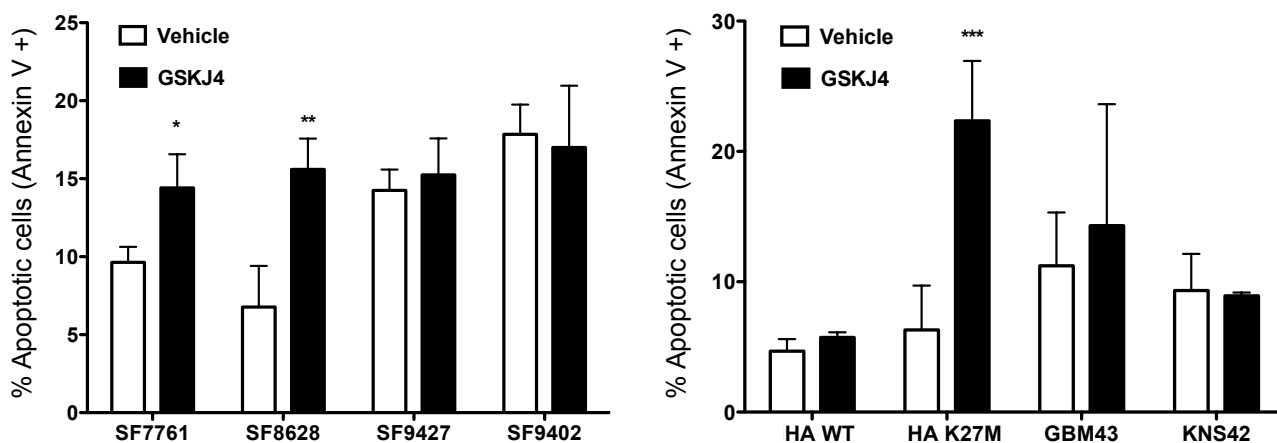

**b.**

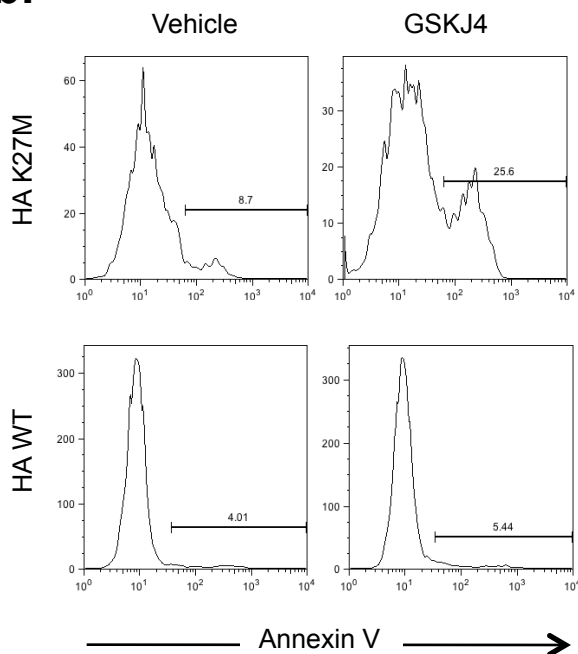

**c.**

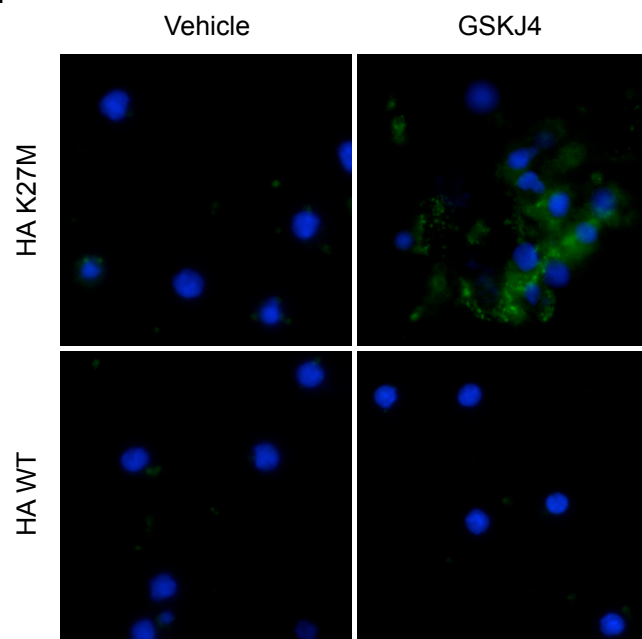

**Supplementary Figure 5. Annexin V flow cytometry analysis of GSKJ4 apoptosis effects.** Cells were treated with 3  $\mu$ M GSKJ4 for 72 h, then collected and treated with Alexa Fluor 488 Annexin V, then flow sorted. Annexin V positivity results are shown above for all cell sources and values shown are the average (mean  $\pm$  SEM) from triplicate samples (2-Way ANOVA with Bonferroni post-test value comparisons between each cell lines, \*  $P = 0.0068$ ; \*\*  $P = 0.0010$ ; \*\*\*  $P = 0.0064$ ) (a), with examples of annexin V flow sorting profiles (b) and annexin V immunocytochemistry (c) shown below.

## Supplementary Figure 6

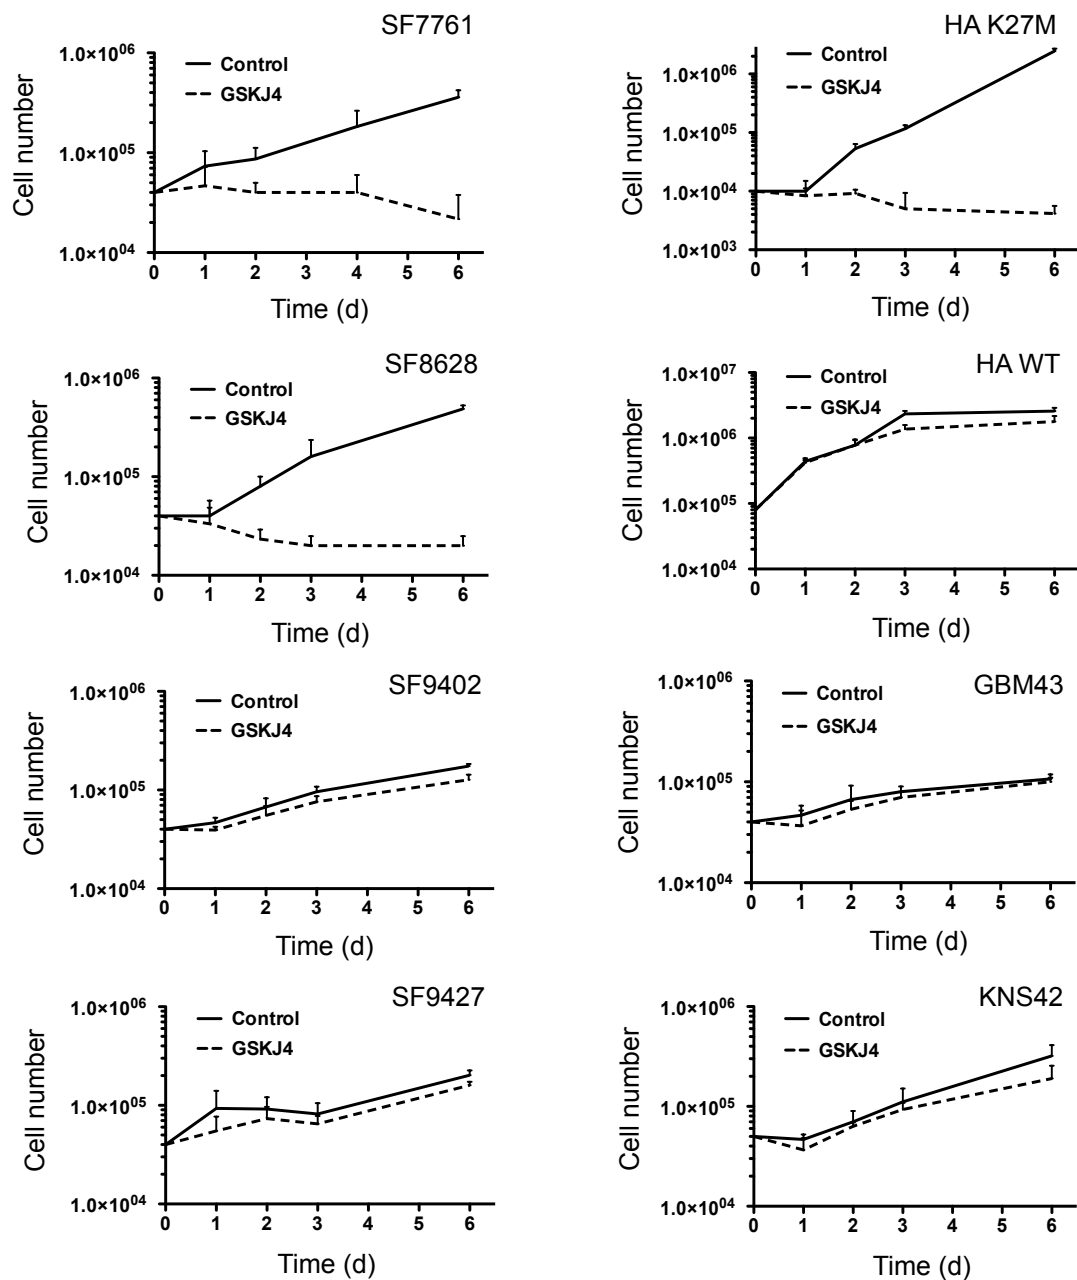

**Supplementary Figure 6. Analysis of GSKJ4 effects on cell number.** Cells were plated then treated with respective IC<sub>50</sub> concentrations (Fig. 1d) of GSKJ4 or vehicle only (control), then collected and counted following 1–6 d of incubation with inhibitor. Results for each time point are based on triplicate samples. Note that y-axes are in log scale.



## Supplementary Figure 7

**a.**

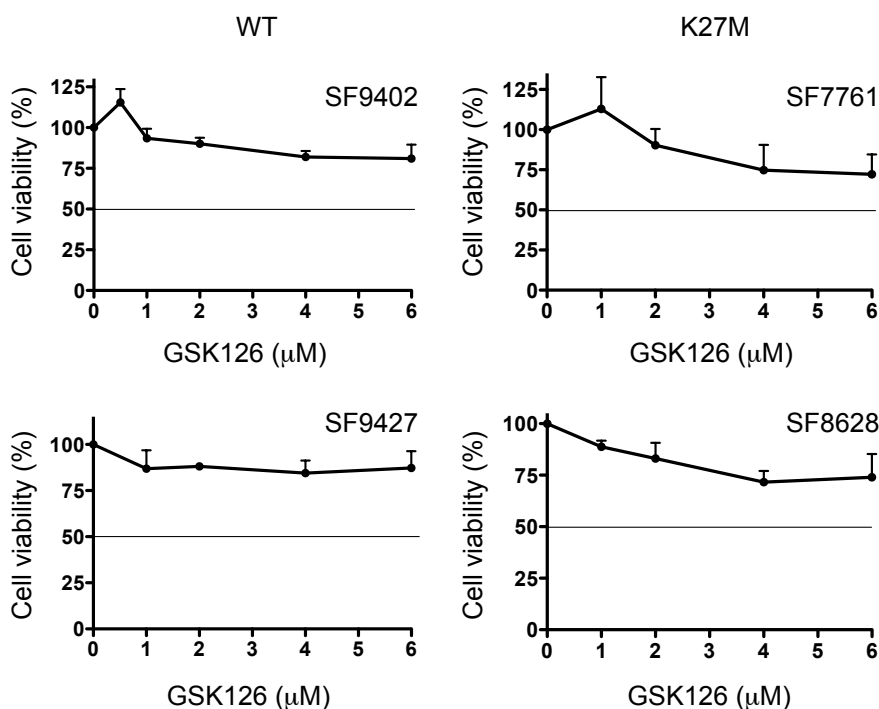

**b.**

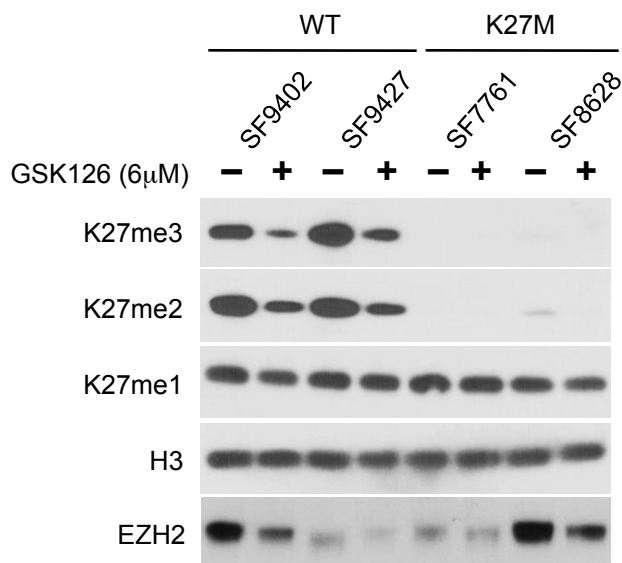

**Supplementary Figure 7. Effect of EZH2 inhibitor GSK126 on glioma cell growth and K27 methylation.** (a) Cell growth plots showing variable, but consistently modest anti-proliferative effect of 72 h incubations with EZH2 inhibitor GSK126 at concentrations of 1–6  $\mu\text{M}$ . Values shown are the average (mean  $\pm$  SEM) from quadruplicate samples for each incubation condition. (b) Immunoblot results showing reductions in K27me3 and K27me2 following 72 h incubation with 6  $\mu\text{M}$  GSK126.

# Supplementary Figure 8

**a.**

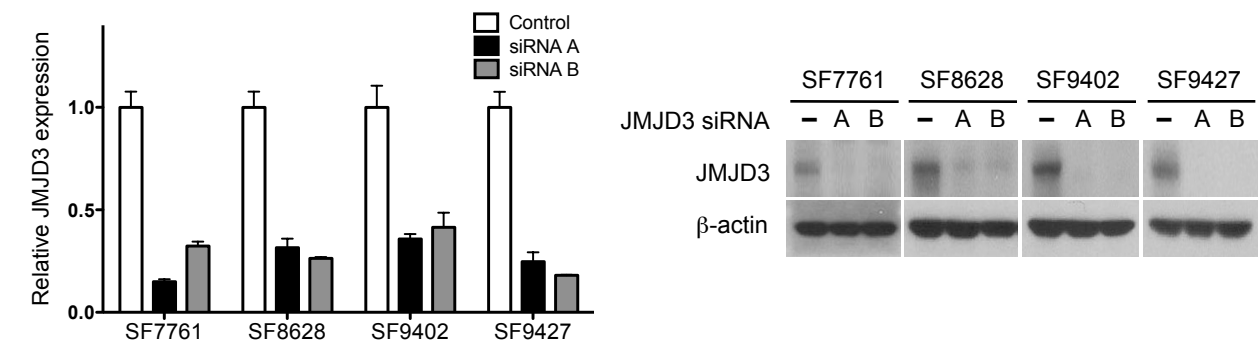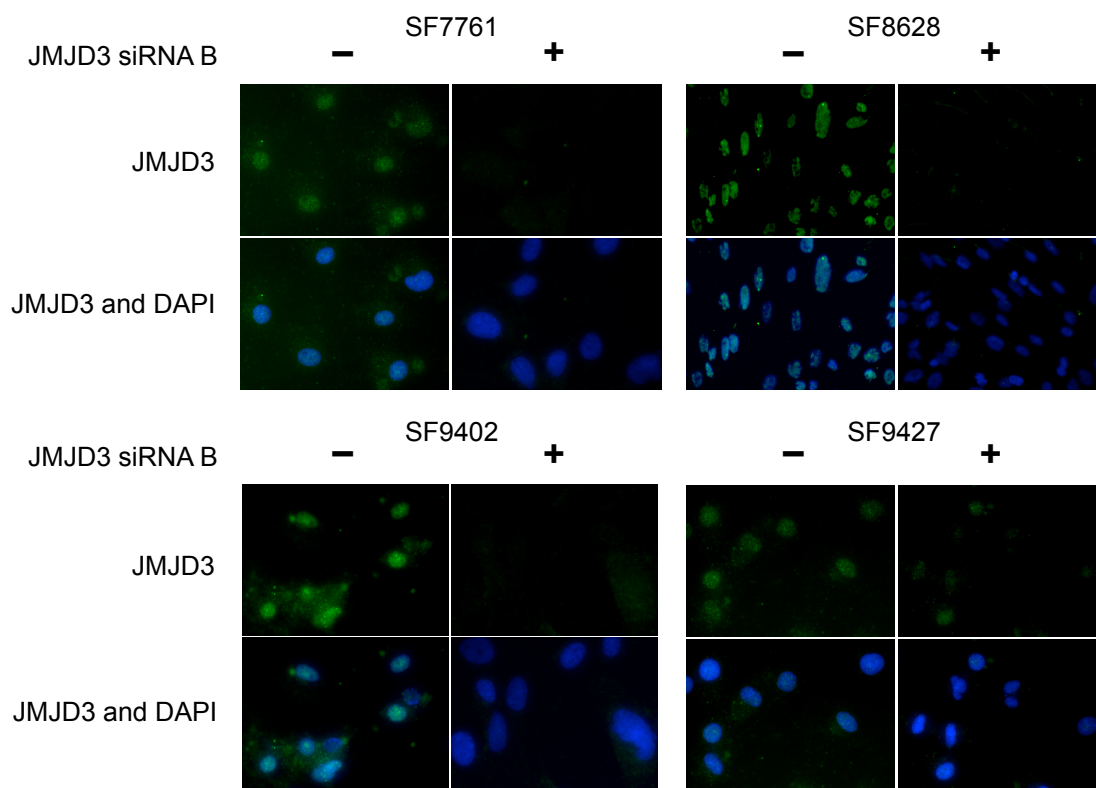

**b.**

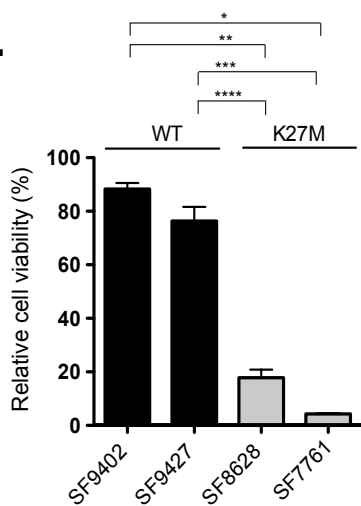

**c.**

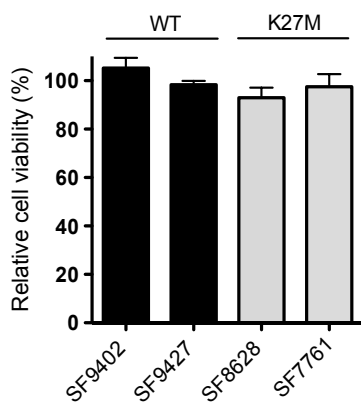

**d.**

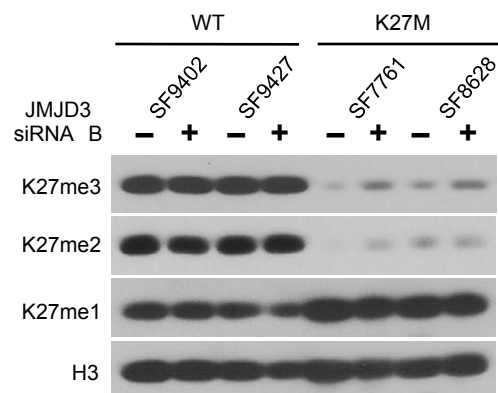

**Supplementary Figure 8. Effect of JMJD3 siRNA on glioma cell proliferation and GSKJ4 inhibitor response.** (a) Indicated cell types were treated with 30 nM JMJD3 siRNA (A, s23109; B, s23110), or scrambled siRNA for 96 h, then examined by quantitative RT-PCR for mRNA expression (upper left) and immunoblotting for protein expression (upper right). Values shown are the average fold change (mean  $\pm$  SEM) from three independent experiments relative to the control, which was given a value of one. Fluorescence immunocytochemistry indicates JMJD3 expression in the cells treated with JMJD3 siRNA B (s23110). (b) Cell viability assay results are based on absorbance values of JMJD3 siRNA B (s23110) treated cells relative to corresponding scrambled siRNA treated cells, with each histogram value based on averages from triplicate samples (mean  $\pm$  SEM). Unpaired *t*-test values for comparisons between cell lines, \*  $P < 0.0001$ ; \*\*  $P < 0.0001$ ; \*\*\*  $P = 0.0002$ ; \*\*\*\*  $P = 0.0006$ . (c) Cells treated with siRNAs for 96 h were then treated with IC<sub>50</sub> concentrations (SF7761 and SF8628) or 6  $\mu$ M (SF9402 and SF9427) GSKJ4 for 72 h, then analyzed for effect of GSKJ4 treatment on proliferation by cell viability assay. Values shown are based on ratios of GSKJ4 and siRNA treated cells vs. corresponding siRNA only treated cells and the averages from triplicate samples (mean  $\pm$  SEM). (d) Western blot results showing effects of JMJD3 siRNA B (s23110) treatments (+) on expression of K27me3, K27me2, K27me1, and total histone H3.

# Supplementary Figure 9

**a.**

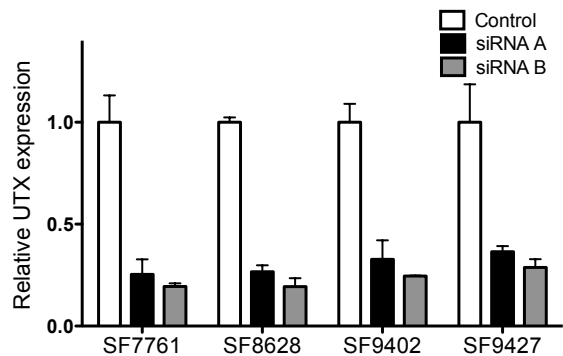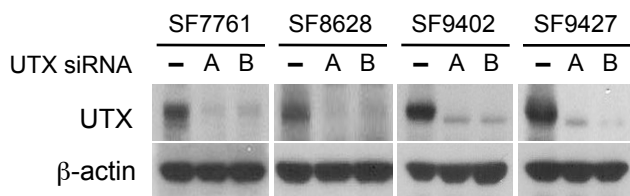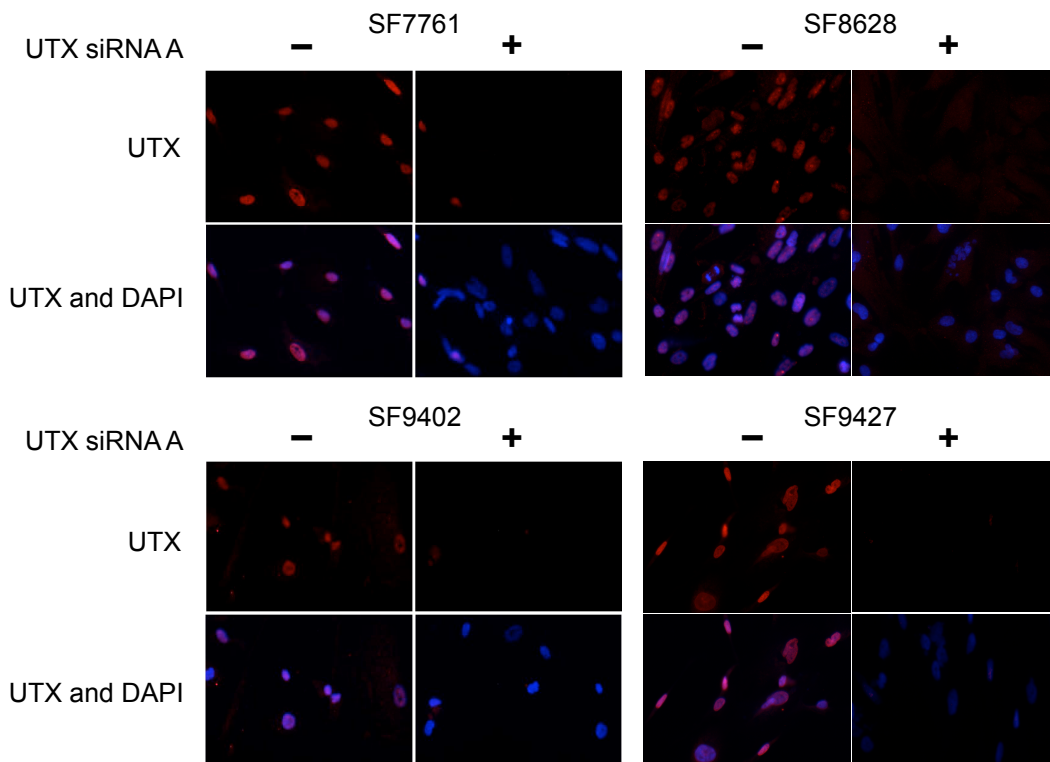

**b.**

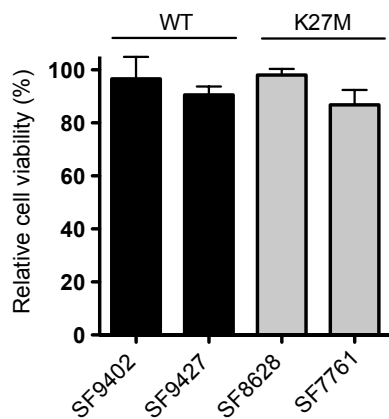

**c.**

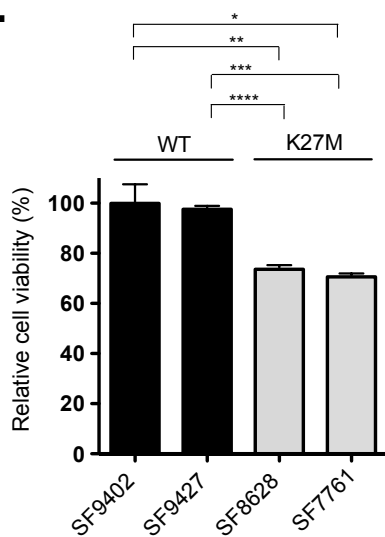

**d.**

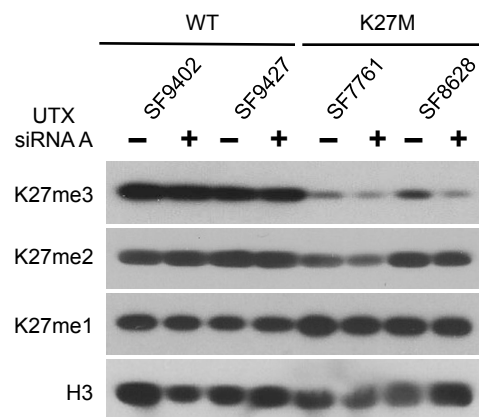

**Supplementary Figure 9. Effect of UTX siRNA on glioma cell proliferation and GSKJ4 inhibitor response.** (a) Indicated cell types were treated with 30 nM UTX (A, s14737; B, s14736), or scrambled siRNA for 96 h, then examined by quantitative RT-PCR for mRNA expression (upper left) and immunoblotting for protein expression (upper right). Values shown are the average fold change (mean  $\pm$  SEM) from three independent experiments relative to the control, which was given a value of one. Fluorescence immunocytochemistry indicates UTX expression in the cells treated with UTX siRNA A (s14737). (b) Cell viability assay results are based on absorbance values of UTX siRNA A (s14737) treated cells relative to corresponding scrambled siRNA treated cells, with each histogram value based on averages from triplicate samples (mean  $\pm$  SEM). (c) Cells treated with siRNAs for 96 h were then treated with  $IC_{50}$  concentrations (SF7761 and SF8628) or 6  $\mu$ M (SF9402 and SF9427) GSKJ4 for 72 h, then analyzed for effect of GSKJ4 treatment on cell proliferation by cell viability assay. Values shown are based on ratios of GSKJ4 and siRNA treated cells vs. corresponding siRNA only treated cells and the averages from triplicate samples (mean  $\pm$  SEM). Unpaired *t*-test values for comparisons between cell lines, \*  $P = 0.0195$ ; \*\*  $P = 0.0281$ ; \*\*\*  $P = 0.0001$ ; \*\*\*\*  $P = 0.0004$ . (d) Western blot results showing effects of UTX siRNA A (s14737) treatments (+) on expression of K27me3, K27me2, K27me1, and total histone H3.



## Supplementary Table 2

| <u>Animal Subject</u> | <u>Brainstem</u> | <u>Hemisphere</u> |
|-----------------------|------------------|-------------------|
| M1                    | 3.76             | ND                |
| M2                    | 4.58             | 4.82              |
| M3                    | 9.48             | 7.46              |

---

All entries represent ng/ml GSKJ1. GSKJ4 was not detected (ND) in any specimen.

**Supplementary Table 2. Inhibitor concentrations in mouse brain tissues.**

## Supplementary Figure 11

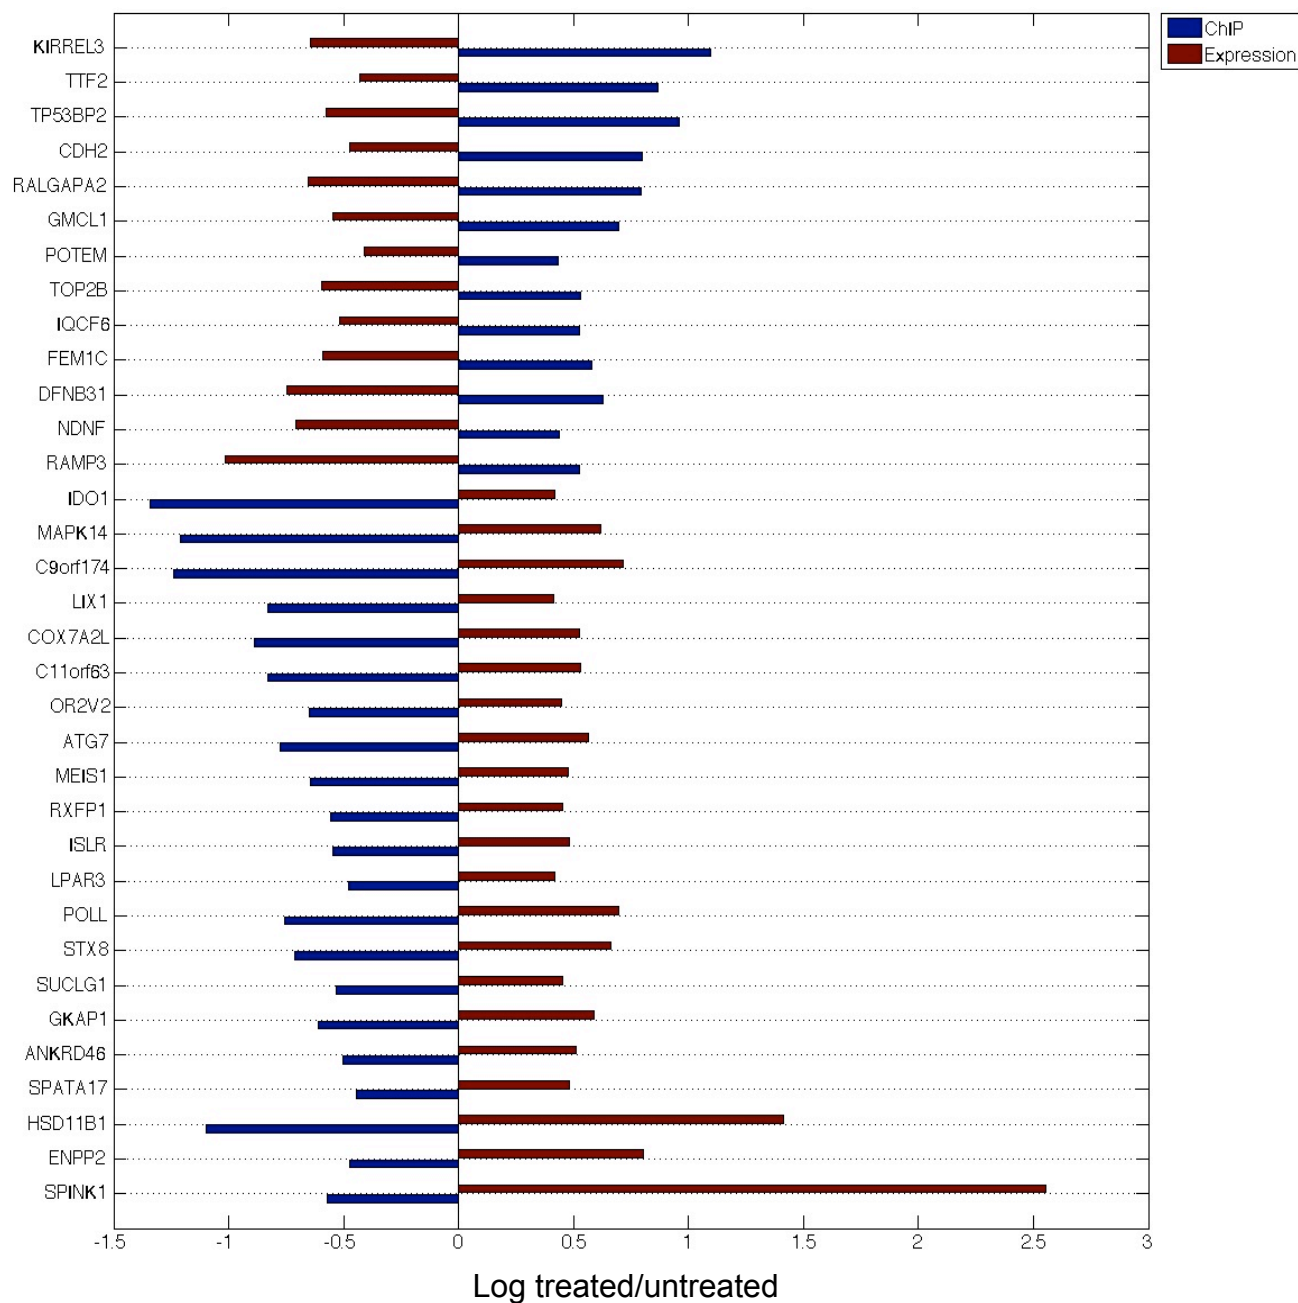

**Supplementary Figure 11. Inverse correlation between GSKJ4 associated gene expression and K27me3 immunoprecipitation changes.** SF8628 cells were treated with 6  $\mu$ M GSKJ4 for 24 and 72 h, with K27me3 chromatin immunoprecipitated and examined for gene sequence content. Treated cells were also used for obtaining RNA that was examined for transcriptome effects of treatment. Results show fold change (natural logarithm) in sequence immunoprecipitation and corresponding gene expression changes from treatment.



### Supplementary Table 3

| <u>Gene</u> | <u>K27me3 ChIP</u> |                | <u>Gene Expression</u> |                |
|-------------|--------------------|----------------|------------------------|----------------|
|             | <u>Log G/V</u>     | <u>P-value</u> | <u>Log G/V</u>         | <u>P-value</u> |
| SPINK1      | -0.5725            | 0.00671        | 2.55568                | 0.01426        |
| ENPP2       | -0.47296           | 0.073          | 0.80505                | 0.07553        |
| HSD11B1     | -1.09766           | 0.04688        | 1.41069                | 0.08904        |
| SPATA17     | -0.44512           | 0.02012        | 0.48251                | 0.00695        |
| ANKRD46     | -0.50423           | 0.09296        | 0.51053                | 0.0362         |
| GKAP1       | -0.609             | 0.02002        | 0.59152                | 0.03415        |
| SUCLG1      | -0.53281           | 0.09058        | 0.45094                | 0.07826        |
| STX8        | -0.71127           | 0.08984        | 0.66405                | 0.03689        |
| POLL        | -0.75434           | 0.02985        | 0.69465                | 0.02214        |
| LPAR3       | -0.47976           | 0.06171        | 0.41912                | 0.00898        |
| ISLR        | -0.54628           | 0.04883        | 0.48236                | 0.01175        |
| RXFP1       | -0.55439           | 0.08325        | 0.4525                 | 0.0289         |
| MEIS1       | -0.64469           | 0.07812        | 0.4766                 | 0.049          |
| ATG7        | -0.77838           | 0.07031        | 0.56546                | 0.08244        |
| OR2V2       | -0.64827           | 0.07812        | 0.44958                | 0.047          |
| C11orf63    | -0.82981           | 0.09375        | 0.53174                | 0.00499        |
| COX7A2L     | -0.88839           | 0.05469        | 0.52409                | 0.03594        |
| LIX1        | -0.8274            | 0.0625         | 0.41204                | 0.02305        |
| C9orf174    | -1.23995           | 0.03125        | 0.71594                | 0.01195        |
| MAPK14      | -1.21113           | 0.03125        | 0.61718                | 0.00149        |
| IDO1        | -1.34244           | 0.01562        | 0.41761                | 0.05488        |
| RAMP3       | 0.52548            | 0.07033        | -1.01426               | 0.06366        |
| NDNF        | 0.43955            | 0.08788        | -0.7071                | 0.03983        |
| DFNB31      | 0.6282             | 0.03015        | -0.74608               | 0.04601        |
| FEM1C       | 0.57947            | 0.07812        | -0.58963               | 0.01008        |
| IQCF6       | 0.5235             | 0.02661        | -0.51587               | 0.00042        |
| TOP2B       | 0.53156            | 0.073          | -0.59619               | 0.07653        |
| POTEM       | 0.43399            | 0.09375        | -0.40957               | 0.02158        |
| GMCL1       | 0.69676            | 0.0625         | -0.54585               | 0.00257        |
| RALGAPA2    | 0.79441            | 0.09375        | -0.65342               | 0.071          |
| CDH2        | 0.80081            | 0.0625         | -0.47452               | 0.01647        |
| TP53BP2     | 0.95885            | 0.0625         | -0.57473               | 0.00074        |
| TTF2        | 0.86936            | 0.03125        | -0.43139               | 0.01178        |
| KIRREL3     | 1.09696            | 0.07812        | -0.64507               | 0.07968        |

G/V, GSKJ4 treated/vehicle treated.

Log2 values are averages of 24 and 72 h treatments.

**Supplementary Table 3. Candidate genes for GSKJ4-caused expression alterations due to changes in K27me3 sequence association.**
